# Supplementary material for: Theranostic liposomes containing conjugated polymer dots and doxorubicin for bio-imaging and targeted therapeutic delivery
Source: Royal Society of Chemistry journal article supplement (doi:10.1039/c5ra24485d), 2015-12-21
Supplement: c5ra24485d1.pdf [file c5ra24485d1.pdf]

### Supporting Information

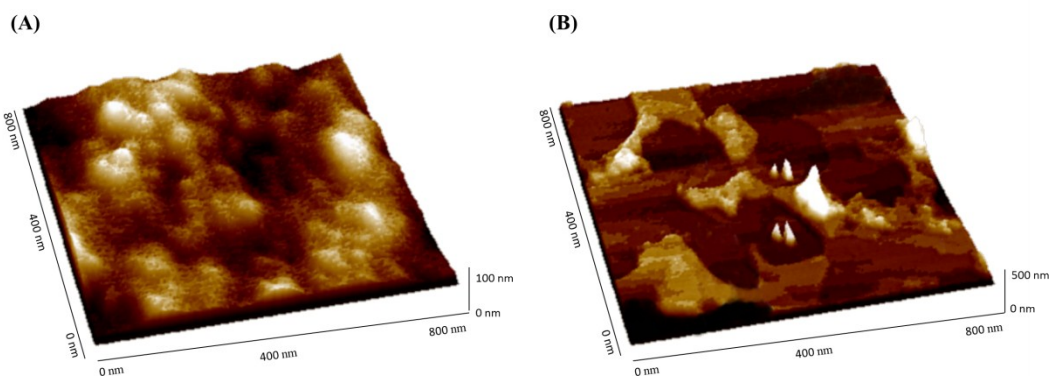

**Supplementary Fig. 1.** Atomic force microscopy (AFM) images for PFBT-Dox-Lip (Fig. 1A) and PFBT-Dox-Lip-FA (Fig. 1B).

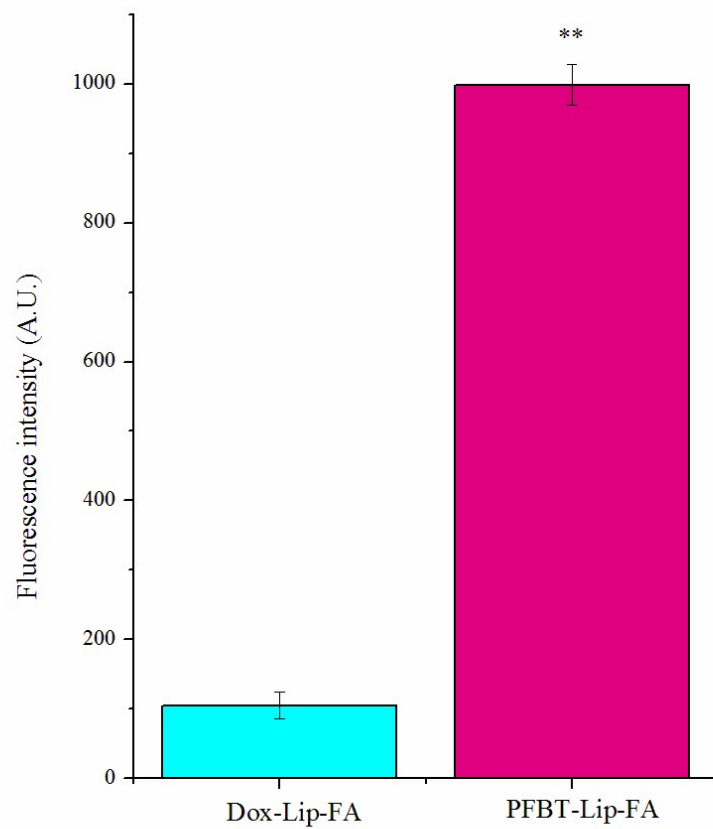

**Supplementary Fig. 2.** Fluorescence intensity of Dox-Lip-FA and PFBT-Lip-FA at the same concentration of 10  $\mu$ M. Data represent the mean  $\pm$  standard deviation of at three experimental determinations (\*\* $p < 0.01$ ).
